# Supplementary material for: Electron-stimulated reactions in nanoscale water films adsorbed on α-Al2O3(0001)
Source: Royal Society of Chemistry journal article supplement (doi:10.1039/c8cp01284a), 2018-01-01
Supplement: c8cp01284a1.pdf [file c8cp01284a1.pdf]

## Supplementary Information

### Electron-stimulated reactions in nanoscale water films adsorbed on $\alpha$ - $\text{Al}_2\text{O}_3(0001)$

Nikolay G. Petrik\* and Greg A. Kimmel\*

Physical Sciences Division, Pacific Northwest National Laboratory, MSIN K8-88, P.O. Box 999,  
Richland, WA 99352, USA.

\*Corresponding authors. Email addresses – [nikolai.petrik@pnnl.gov](mailto:nikolai.petrik@pnnl.gov); [gregory.kimmel@pnnl.gov](mailto:gregory.kimmel@pnnl.gov)

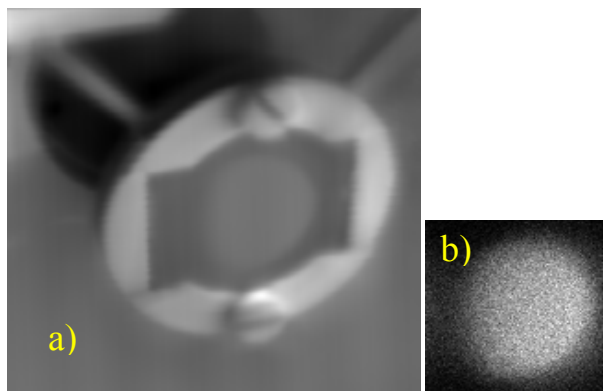

Fig. S1. a) Secondary electron image of a 40 ML  $\text{H}_2\text{O}$  film adsorbed on the  $\text{Al}_2\text{O}_3(0001)$  sample (mounted on the sample holder). The image is obtained by rastering a 500 eV electron beam over the sample (at 30 K) and collecting the emitted secondary electrons versus the beam X-Y deflection. The  $10\times 10\times 1$  mm crystal is attached to the resistively-heated  $\varnothing 15$  mm and 1 mm thick Ta base plate using high-temperature Aremco 865 cement adhesive and covered from the front with a Mo retaining ring and 2 Mo screws (seen in the image). The 7 mm diameter 40 ML thick water spot dosed on the  $\text{Al}_2\text{O}_3$  surface with a molecular beam is also seen in this image (lighter grey). The good resolution of the image, especially for the water spot, indicates that charging is not a significant issue here. A K-type thermocouple is spot-welded to the back side of the Ta base plate (not seen here). The Ta resistive heating leads are seen in the upper left and right corners. b)  $\text{O}_2$  ESD image from a 40 ML thick water spot dosed on the  $\text{Al}_2\text{O}_3$  surface obtained by rastering

the 100 eV electron beam over the sample and measuring the O<sub>2</sub> signal versus the beam X-Y deflection. The electron beam is smaller than the molecular beam spot size on the sample (~1.5 mm and 7.0 mm, respectively). The ESD signals presented in this study are an average of 80,000 data points (400 pixels/scan  $\times$  200 points/pixel) per each 0.4 s scan.

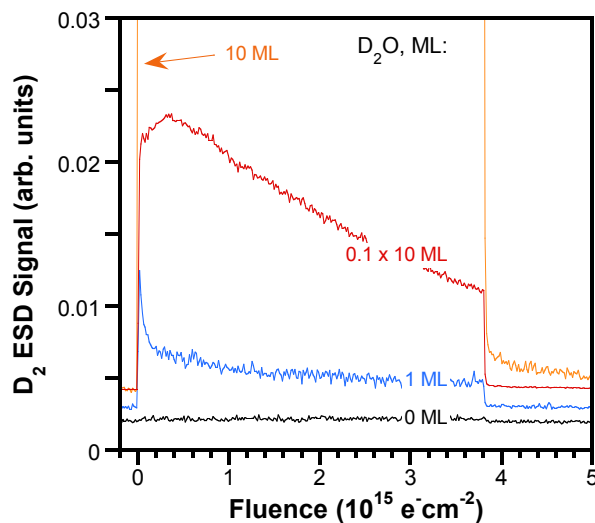

Fig. S2. D<sub>2</sub> ESD signals at 100 K versus electron fluence from 0, 1 and 10 ML of D<sub>2</sub>O on Al<sub>2</sub>O<sub>3</sub>(0001). The traces are displaced for the sake of comparison. Radiation-induced change in the D<sub>2</sub> background signal is not significant (0 ML, black trace).

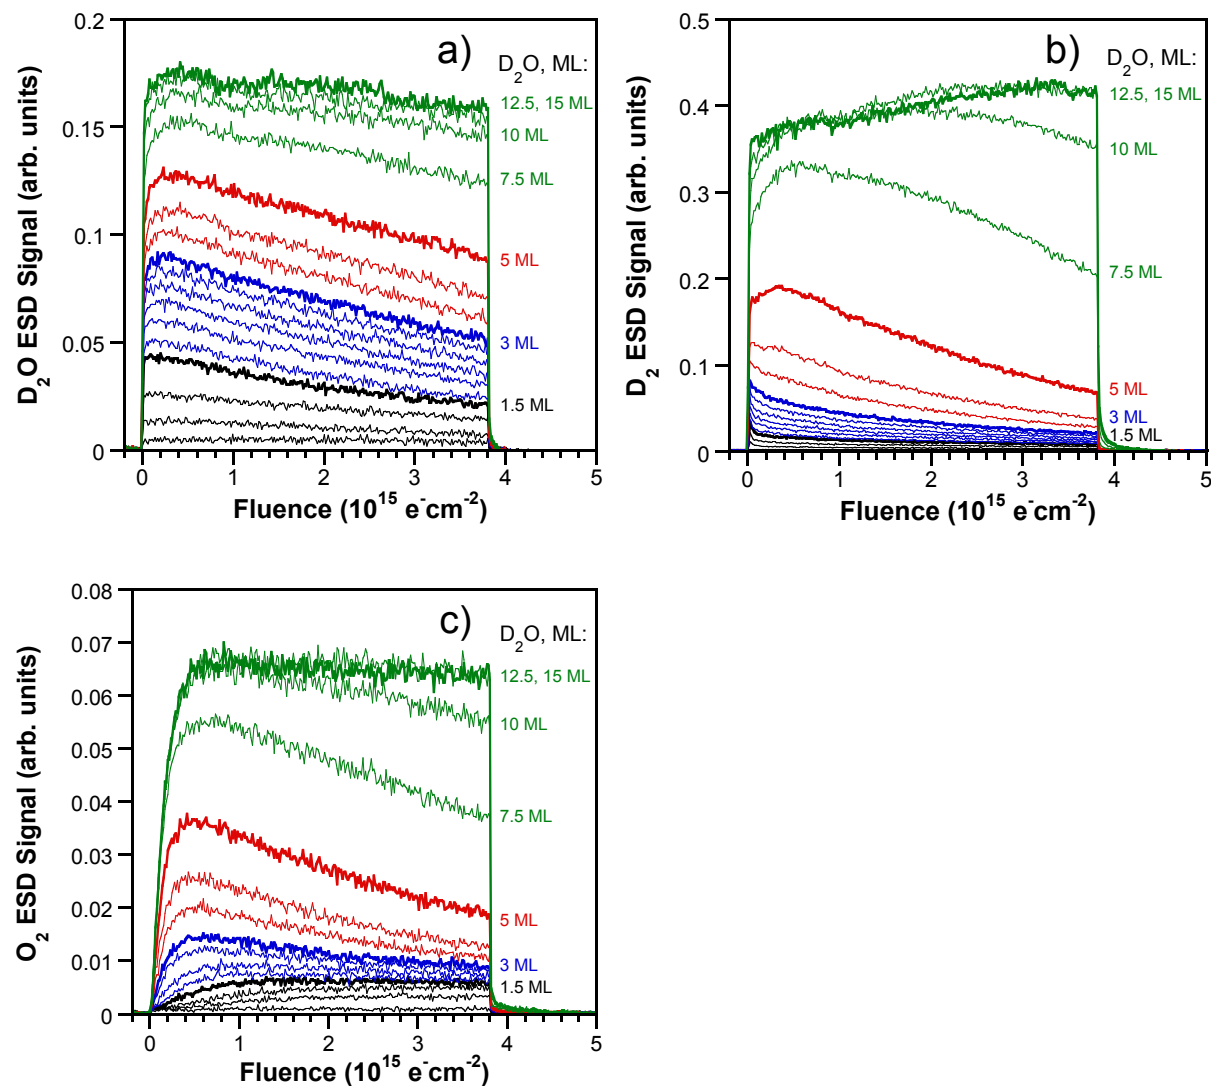

Fig. S3.  $D_2O$ ,  $D_2$  and  $O_2$  ESD signals at 100 K versus electron fluence for various coverages of  $D_2O$  on  $Al_2O_3(0001)$ . (1 ML =  $10^{15} \text{ cm}^{-2}$ ).

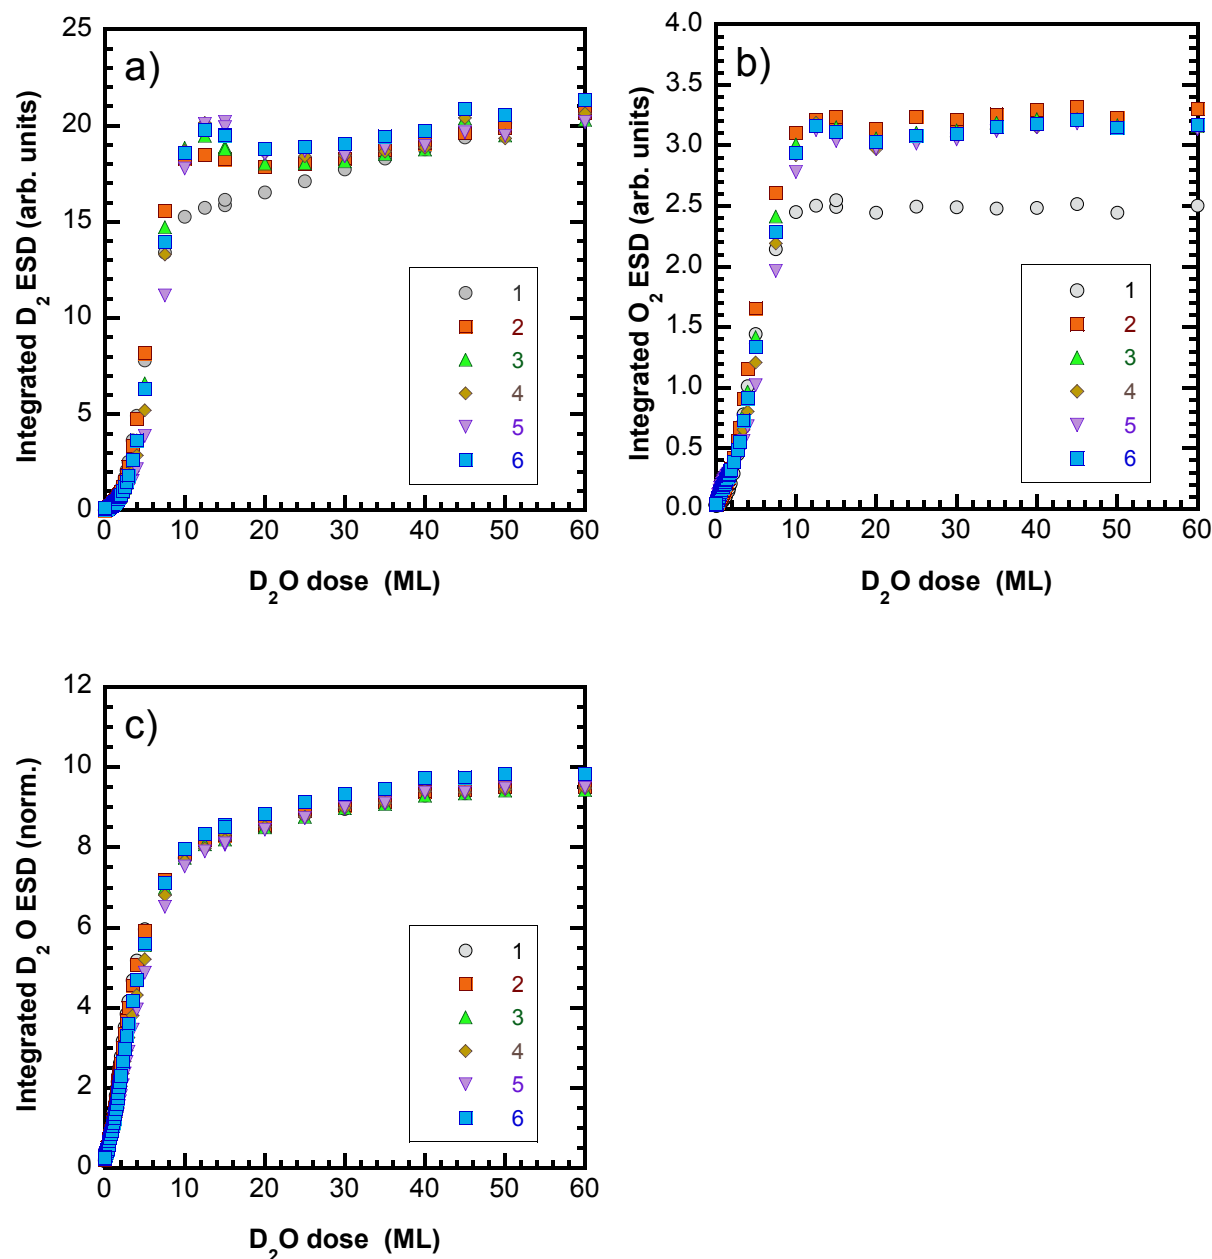

Fig. S4. a)  $D_2$ , b)  $O_2$  and c)  $D_2O$  ESD yields integrated in different electron fluence ranges versus initial  $D_2O$  coverage on  $Al_2O_3(0001)$  for the data presented in Fig. 3. The integrations start at  $\phi_e =$  (1) 0, (2) 0.46, (3) 1.22, (4) 1.98, and (5)  $2.74 \times 10^{15} \text{ cm}^{-2}$ , and the same integration width ( $\Delta\phi_e = 0.76 \times 10^{15} \text{ cm}^{-2}$ ) is used for each. (6) The total ESD integrals from Fig. 3, arbitrarily scaled to facilitate comparison, are also shown. The initial  $D_2$  ESD integral ((a), 1, grey circles) is also multiplied by 0.9 for the sake of comparison. A small peak in  $D_2$  ESD data (a) in the 8 – 20 ML coverage range, which is initially absent, develops at higher

fluences. This peak is associated with D<sub>2</sub> molecules produced at the Al<sub>2</sub>O<sub>3</sub>/D<sub>2</sub>O interface from precursors accumulating on the alumina surface with irradiation time. A similar peak can be seen in the O<sub>2</sub> ESD data (b), but not in the D<sub>2</sub>O ESD data (c). D<sub>2</sub>O ESD occurs from the D<sub>2</sub>O/vacuum interface and it is not associated with reactions at the Al<sub>2</sub>O<sub>3</sub>/D<sub>2</sub>O interface.<sup>1</sup> O<sub>2</sub> is also produced at the D<sub>2</sub>O/vacuum interface but it is correlated with D<sub>2</sub> production and associated with reactions at the Al<sub>2</sub>O<sub>3</sub>/D<sub>2</sub>O interface (see more details in our earlier publications<sup>2,3</sup>).

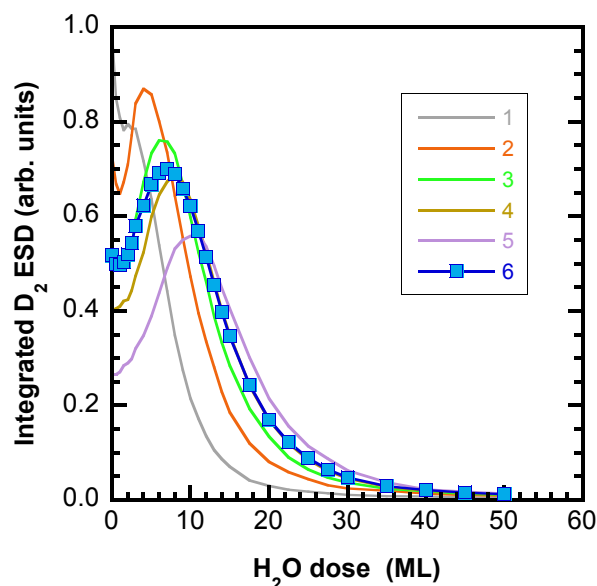

Fig. S5. D<sub>2</sub> ESD yields integrated in different electron fluence ranges versus the initial H<sub>2</sub>O cap coverage in isotopically layered D<sub>2</sub>O/H<sub>2</sub>O films on Al<sub>2</sub>O<sub>3</sub>(0001) for the data presented in Fig. 5. The integrations start at  $\phi_e = (1) 0, (2) 0.30, (3) 1.07, (4) 1.83, \text{ and } (5) 3.36 \times 10^{15} \text{ cm}^{-2}$  and the same integration width ( $\Delta\phi_e = 0.30 \times 10^{15} \text{ cm}^{-2}$ ) is used for each. (6) The total ESD integral from Fig. 5, arbitrarily scaled to facilitate comparison, is also shown. At higher fluence, the maximum in the D<sub>2</sub> ESD shifts to the higher H<sub>2</sub>O coverage due to the film sputtering (initial coverage is higher than the actual one) and due to the greater contribution of the reactions at the Al<sub>2</sub>O<sub>3</sub>/D<sub>2</sub>O interface.

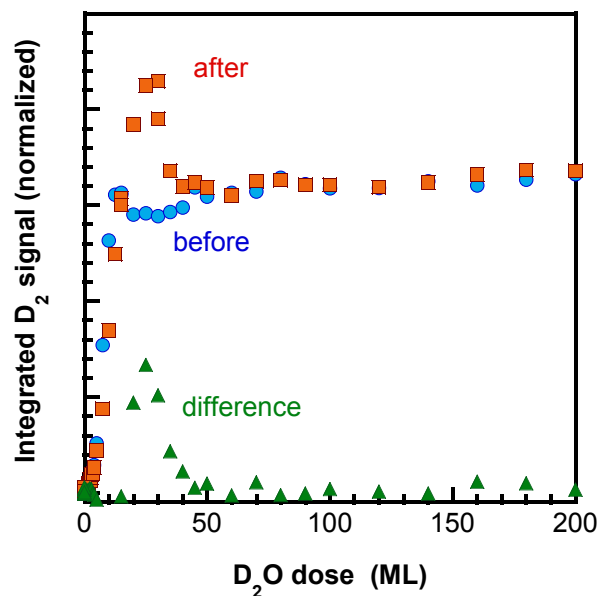

Fig. S6. Integrated D<sub>2</sub> ESD yields versus initial D<sub>2</sub>O coverage on Al<sub>2</sub>O<sub>3</sub>(0001). The ESD yields are integrated during 1 s before the end of irradiation with a fluence of  $3.8 \times 10^{15} \text{ cm}^{-2}$  (blue circles) and 20 s after the end of irradiation (red squares). The maximum in the D<sub>2</sub> ESD signal near 25 ML observed after irradiation is due to D<sub>2</sub> molecules produced at the Al<sub>2</sub>O<sub>3</sub>/D<sub>2</sub>O interface and diffusing through the film to desorb. Above 25 ML, this signal decreases since the D<sub>2</sub> yield at the Al<sub>2</sub>O<sub>3</sub>/D<sub>2</sub>O interface decreases with coverage (compare to the Fig. 5b and note that the actual coverage of the film is lower than initial due to sputtering). Above 50 ML, the post-radiation D<sub>2</sub> ESD yield stabilizes at a coverage-independent level proportional to the D<sub>2</sub> ESD signal at the end of irradiation (blue circles) and associated with a certain pumping out rate of our chamber. This component of the signal is associated mainly with the electron-induced processes at the D<sub>2</sub>O/vacuum interface. Signal normalization and subtraction of this “pumping tail” yields the D<sub>2</sub> component produced at the Al<sub>2</sub>O<sub>3</sub>/D<sub>2</sub>O interface (green triangles). Similar post-irradiation sample outgassing was also observed earlier for the Pt(111)/ASW systems and associated with the molecular hydrogen produced at the metal/water interface.<sup>4, 5</sup>

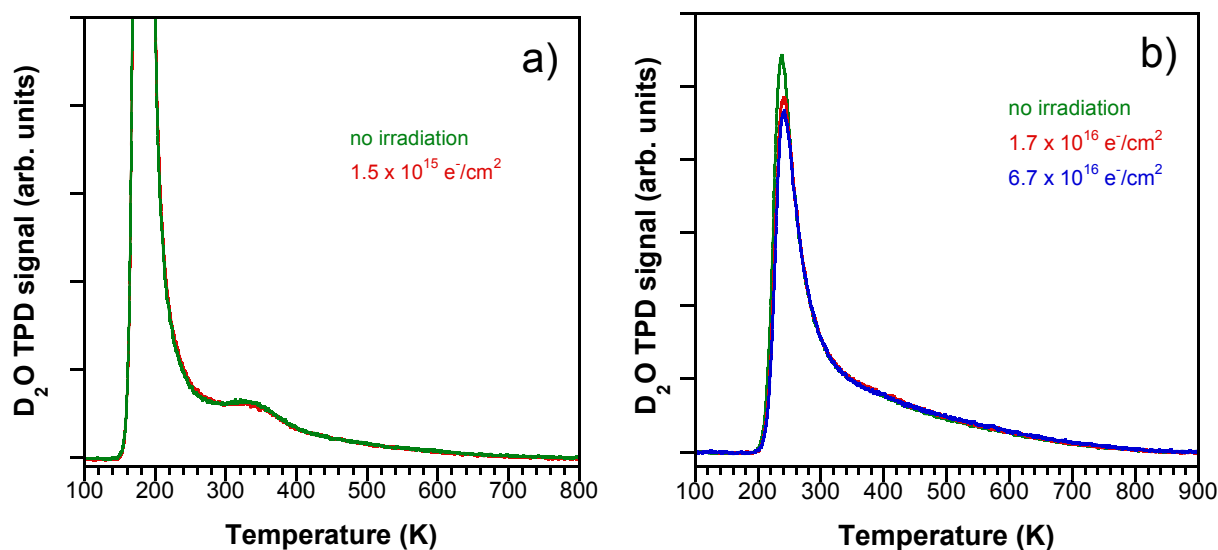

Fig. S7. a) TPD spectrum of 5 ML D<sub>2</sub>O irradiated with  $1.5 \times 10^{15} \text{ e}^-/\text{cm}^2$  electrons ( $E_i = 100 \text{ eV}$ ) (red) and of similar coverage of non-irradiated D<sub>2</sub>O (green). b) TPD spectrum of 0.5 ML D<sub>2</sub>O dosed on Al<sub>2</sub>O<sub>3</sub>(0001) pre-irradiated with 500 eV electrons ( $1.7 \times 10^{16} \text{ e}^-/\text{cm}^2$  and  $6.7 \times 10^{16} \text{ e}^-/\text{cm}^2$ ) and not irradiated (red, blue and green respectively).  $1 \text{ ML} = 10^{15} \text{ cm}^{-2}$ .

## References

1. N. G. Petrik and G. A. Kimmel, *J. Chem. Phys.*, 2005, **123**, 054702.
2. N. G. Petrik, A. G. Kavetsky and G. A. Kimmel, *J. Phys. Chem. B*, 2006, **110**, 2723-2731.
3. N. G. Petrik, A. G. Kavetsky and G. A. Kimmel, *J. Chem. Phys.*, 2006, **125**, 124702.
4. N. G. Petrik and G. A. Kimmel, *J. Chem. Phys.*, 2004, **121**, 3736 - 3744.
5. N. G. Petrik and G. A. Kimmel, *Phys. Rev. Lett.*, 2003, **90**, 166102.
